# Supplementary material for: Blood-meal analysis of Culicoides (Diptera: Ceratopogonidae) reveals a broad host range and new species records for Romania
Source: PubMed Central journal article supplement (PMC7027113; doi:10.1186/s13071-020-3938-1), 2020-02-17
Supplement: 13071_2020_3938_MOESM3_ESM.pdf [file 13071_2020_3938_MOESM3_ESM.pdf]

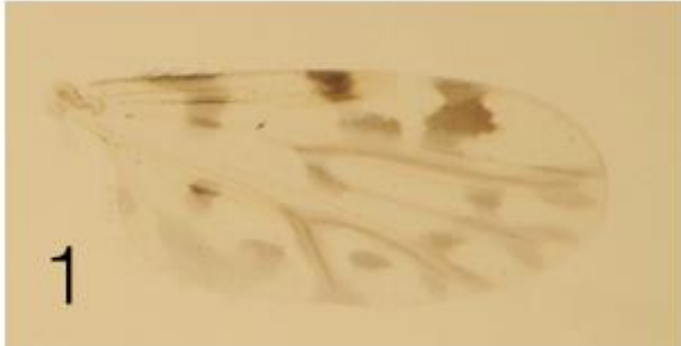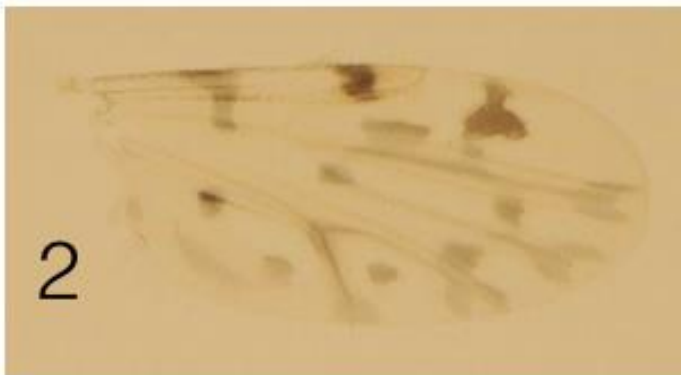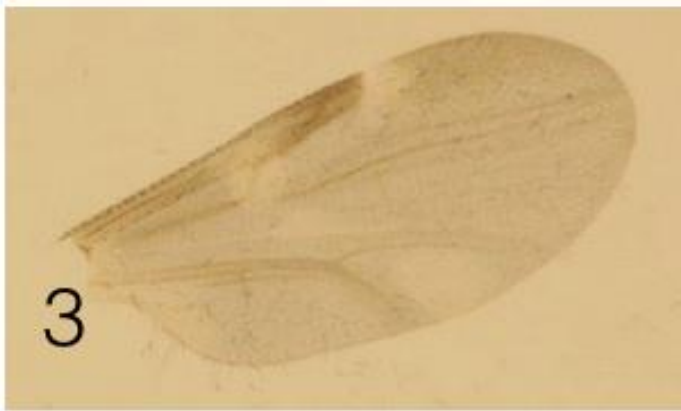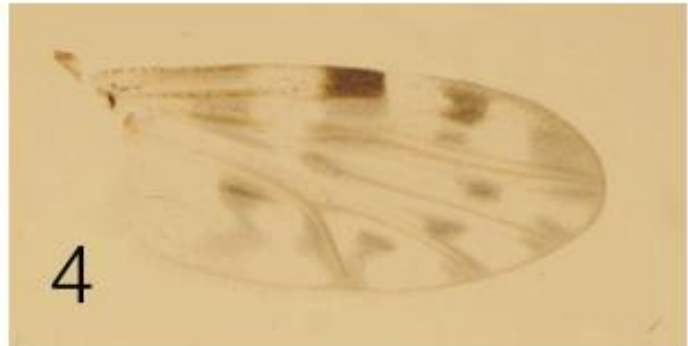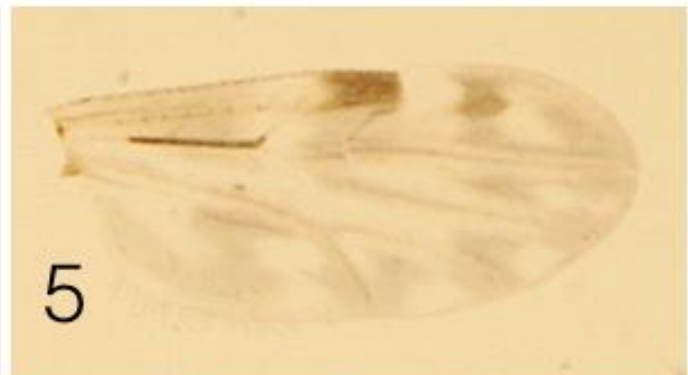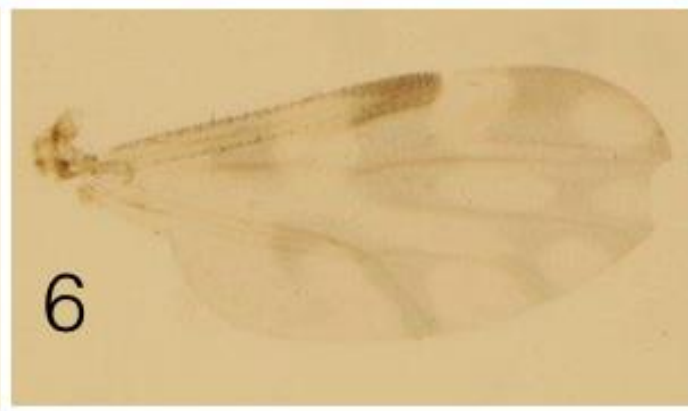

1. *C. punctatus*
2. *C. punctatus* P
3. *C. kibunensis*

4. *C. puncticollis* (unfed)
5. *C. riethi*
6. *C. griseidorsum*
